# Supplementary material for: Mucosal Gene Expression of Antimicrobial Peptides in Inflammatory Bowel Disease Before and After First Infliximab Treatment
Source: PLoS One. 2009 Nov 24;4(11):e7984. doi: 10.1371/journal.pone.0007984 (PMC2776509; doi:10.1371/journal.pone.0007984)
Supplement: Table S3 — The results (p-value) from the comparative analyses of the qPCR data of DEFB1, LEAP2, PYY, DEFA5, DEFA6 and DEFB4 in intestinal mucosa of IBD patients before and after first infliximab treatment. R: responders, NR: non-responders. (0.02 MB XLS) [file pone.0007984.s005.xls]

## Sheet: Sheet1
Comparison	DEFB1	LEAP2	PYY	DEFA5	DEFA6	DEFB4
	p-value	p-value	p-value	p-value	p-value	p-value
UC before therapy vs CDc before therapy	0.005	0.44	0.221	0.045	0.02	0.001
UC R after therapy vs CDc R after therapy	0.315	0.191	0.615	0.315	0.366	0.662
UC before therapy vs control colons	< 0.001	0.002	0.12	0.001	0.001	< 0.001
CDc before therapy vs control colons	0.001	0.019	0.567	< 0.001	< 0.001	< 0.001
IBDc before therapy vs control colons	< 0.001	0.004	0.234	< 0.001	< 0.001	< 0.001
CDi before therapy vs control ileums	0.062	0.029	0.001	0.069	0.294	< 0.001
UC after therapy vs UC before therapy	0.003	< 0.001	0.001	0.322	0.274	0.002
CDc after therapy vs CDc before therapy	0.035	0.136	0.122	0.845	0.811	0.01
IBDc after therapy vs IBDc before therapy	< 0.001	< 0.001	< 0.001	0.591	0.625	< 0.001
CDi after therapy vs CDi before therapy	0.101	0.009	0.177	0.07	0.756	0.035
UC R after therapy vs UC R before therapy	0.028	0.028	0.028	0.463	0.463	0.028
CDc R after therapy vs CDc R before therapy	0.075	0.213	0.11	0.328	0.424	0.074
IBDc R after therapy vs IBDc R before therapy	0.009	0.017	0.007	0.831	0.795	0.004
CDi R after therapy vs CDi R before therapy	0.225	0.249	0.31	0.028	0.735	0.063
UC NR after therapy vs UC NR before therapy	0.049	0.006	0.015	0.535	0.46	0.023
CDc NR after therapy vs CDc NR before therapy	0.249	0.463	0.398	0.612	0.612	0.046
IBDc NR after therapy vs IBDc NR before therapy	0.039	0.006	0.014	0.33	0.39	0.006
CDi NR after therapy vs CDi NR before therapy	0.208	0.012	0.508	0.953	0.953	0.237
UC R after therapy vs control colons	0.004	0.631	0.2	0.004	0.004	0.514
CDc R after therapy vs control colons	0.021	0.044	0.269	0.014	0.005	0.126
IBDc R after therapy vs control colons	0.004	0.107	0.183	0.003	0.001	0.18
CDi R after therapy vs control ileums	0.749	0.886	0.004	1	0.775	0.002
CDc before therapy vs CDi before therapy	0.515	< 0.001	0.001	< 0.001	< 0.001	0.644
CDc R after therapy vs CDi R after therapy	0.269	< 0.001	0.002	< 0.001	< 0.001	0.241
